# Supplementary material for: A deep neural network approach to predicting clinical outcomes of neuroblastoma patients
Source: BMC Med Genomics. 2019 Dec 20;12(Suppl 8):178. doi: 10.1186/s12920-019-0628-y (PMC6923884; doi:10.1186/s12920-019-0628-y)
Supplement: Supplementary file 1 — Additional file 1 Supplementary Figures S1-S2. PDF file. [file 12920_2019_628_MOESM1_ESM.pdf]

# Additional file 1 for “A deep neural network approach to predict clinical outcomes of Neuroblastoma patients”

Léon-Charles Tranchevent<sup>1</sup>, Francisco Azuaje<sup>1</sup>, and Jagath C. Rajapakse<sup>2</sup>

<sup>1</sup>Proteome and Genome Research Unit, Department of Oncology, Luxembourg Institute of Health, Luxembourg.

<sup>2</sup>Bioinformatics Research Center, School of Computer Engineering, Nanyang Technological University, Singapore

## List of Figures

|    |                                                                               |   |
|----|-------------------------------------------------------------------------------|---|
| S1 | Performance of the DNN models with various architectures. . . . .             | 1 |
| S2 | Detailed performance of the models trained with different parameters. . . . . | 2 |

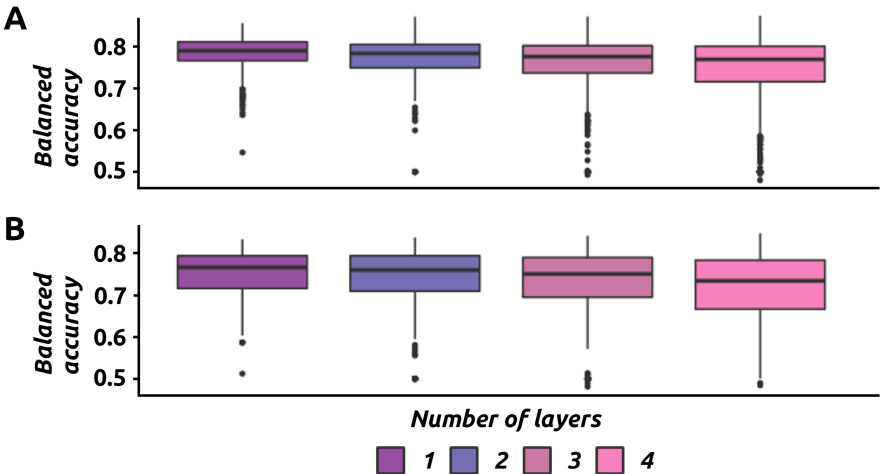

Supplementary Figure S1: The performance (*i.e.*, balanced accuracy) of DNN models with different architectures (*i.e.*, number of layers) for ‘*Death from disease*’ (A) and ‘*Disease progression*’ (B).

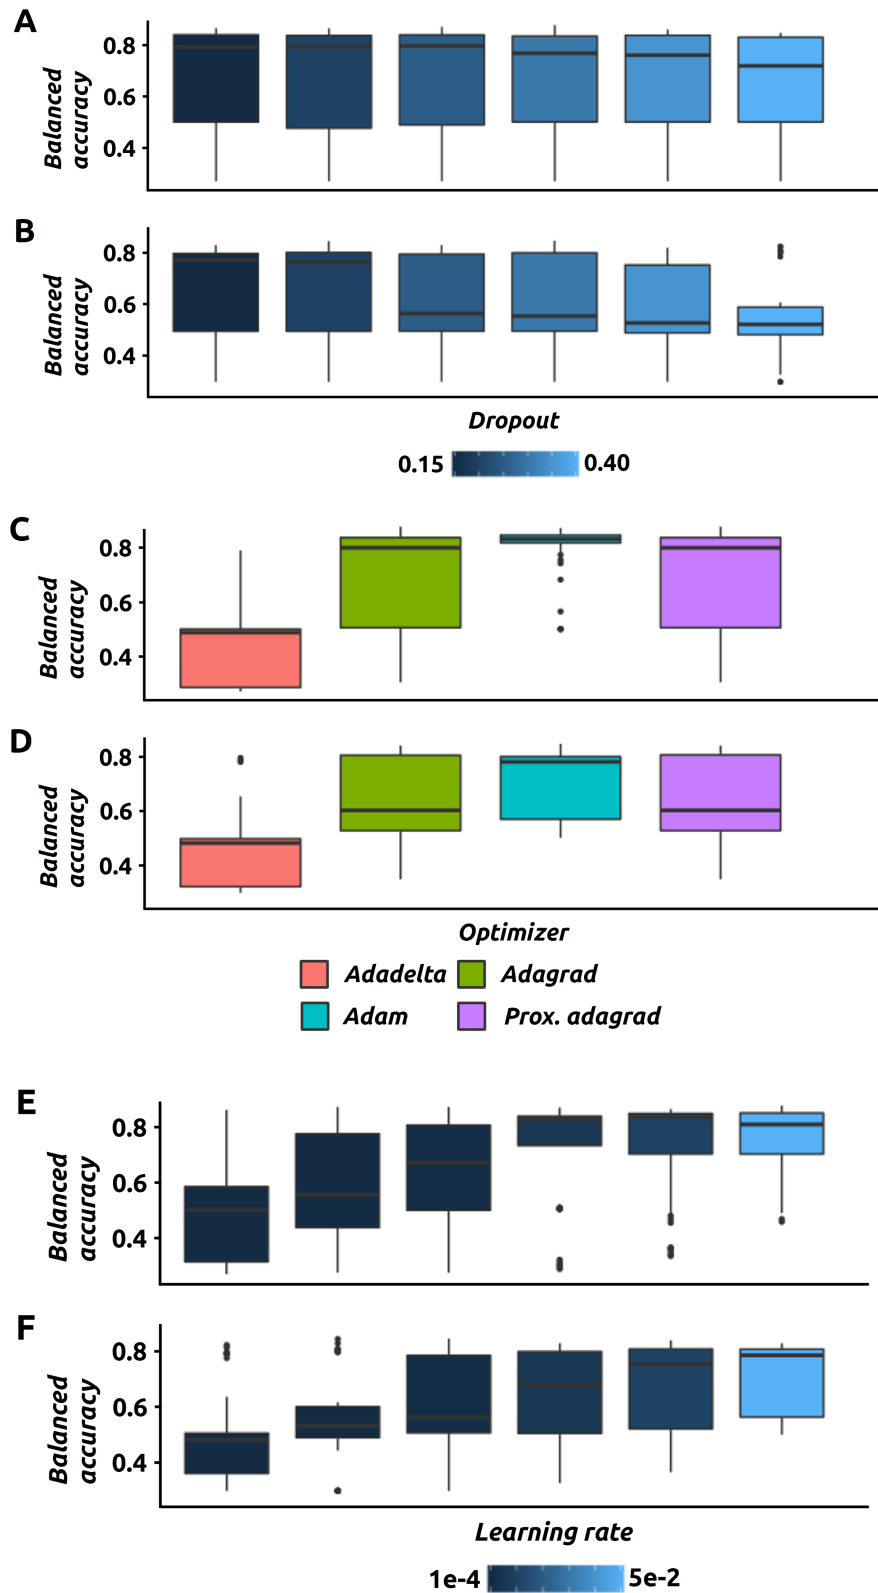

Supplementary Figure S2: The performance (*i.e.*, balanced accuracy) of DNN models in function of hyper-parameter such as dropout (A and B), optimizing strategy (C and D) and learning rate (E and F). Results are displayed for ‘*Death from disease*’ (A, C and E) and ‘*Disease progression*’ (B, D and F).
