# Supplementary material for: A deep neural network approach to predicting clinical outcomes of neuroblastoma patients
Source: BMC Med Genomics. 2019 Dec 20;12(Suppl 8):178. doi: 10.1186/s12920-019-0628-y (PMC6923884; doi:10.1186/s12920-019-0628-y)
Supplement: Supplementary file 2 — Additional file 2 Patient stratification of the ‘Fischer’ dataset. XLSX file. [file 12920_2019_628_MOESM2_ESM.xlsx]

## Sheet: Fischer
Train_part1						Train_part2						Eval						Valid
Patient_id	Gender	High-risk	progression	death from disease		Patient_id	Gender	High-risk	progression	death from disease		Patient_id	Gender	High-risk	progression	death from disease		Patient_id	Gender	High-risk	progression	death from disease
NB002	0	1	1	1		NB004	1	1	0	0		NB001	0	1	1	1		NB003	1	1	1	1
NB006	0	0	0	0		NB008	0	1	0	0		NB005	1	1	1	1		NB007	0	1	1	0
NB010	0	1	1	1		NB012	0	0	0	0		NB009	1	1	0	0		NB011	0	0	0	0
NB014	1	0	0	0		NB016	1	0	0	0		NB013	0	1	1	1		NB015	0	1	1	0
NB018	0	0	0	0		NB020	0	0	0	0		NB017	0	0	0	0		NB019	1	0	0	0
NB022	0	0	0	0		NB024	1	0	0	0		NB021	1	0	0	0		NB023	0	0	0	0
NB026	1	0	0	0		NB028	1	0	0	0		NB025	0	0	0	0		NB027	1	0	0	0
NB030	0	0	0	0		NB032	1	0	0	0		NB029	0	0	0	0		NB031	1	0	0	0
NB034	1	0	0	0		NB036	0	0	0	0		NB033	1	0	0	0		NB035	0	0	0	0
NB038	1	0	0	0		NB040	0	0	0	0		NB037	1	0	0	0		NB039	1	0	0	0
NB042	1	0	0	0		NB044	1	0	0	0		NB041	1	0	0	0		NB043	0	0	0	0
NB046	1	0	0	0		NB048	0	0	0	0		NB045	1	0	0	0		NB047	1	0	0	0
NB050	1	0	0	0		NB052	1	0	0	0		NB049	1	0	0	0		NB051	0	0	0	0
NB054	1	0	0	0		NB056	0	0	0	0		NB053	0	0	0	0		NB055	1	0	0	0
NB058	1	0	0	0		NB060	0	0	0	0		NB057	0	0	0	0		NB059	1	0	0	0
NB062	1	0	0	0		NB064	0	0	0	0		NB061	0	0	0	0		NB063	1	0	1	0
NB066	1	0	1	0		NB068	1	0	0	0		NB065	0	0	0	0		NB067	0	0	0	0
NB070	1	0	0	0		NB072	0	0	0	0		NB069	1	0	1	1		NB071	1	0	0	0
NB074	0	0	1	0		NB076	0	0	0	0		NB073	1	0	0	0		NB075	1	0	0	0
NB078	0	0	0	0		NB080	1	1	1	1		NB077	0	0	0	0		NB079	0	0	0	0
NB082	0	1	0	0		NB084	1	0	0	0		NB081	0	1	0	0		NB083	0	1	0	0
NB086	1	0	1	0		NB088	1	0	0	0		NB085	1	0	0	0		NB087	0	1	1	0
NB090	1	1	1	1		NB092	0	1	1	1		NB089	0	0	0	0		NB091	0	1	1	0
NB094	0	1	1	1		NB096	1	0	0	0		NB093	0	0	0	0		NB095	0	0	0	0
NB098	0	0	0	0		NB100	0	0	0	0		NB097	1	0	0	0		NB099	0	0	0	0
NB102	0	0	0	0		NB104	0	0	0	0		NB101	0	0	0	0		NB103	1	0	1	0
NB106	0	0	1	0		NB108	0	0	0	0		NB105	1	0	0	0		NB107	1	0	0	0
NB110	0	0	0	0		NB112	1	0	0	0		NB109	0	0	1	0		NB111	1	0	0	0
NB114	0	0	0	0		NB116	1	0	0	0		NB113	0	1	1	0		NB115	0	0	0	0
NB118	0	0	0	0		NB120	0	0	0	0		NB117	1	0	1	0		NB119	1	0	1	1
NB126	1	0	0	0		NB122	1	0	1	1		NB121	0	0	0	0		NB123	0	0	0	0
NB130	0	0	1	0		NB124	0	0	1	0		NB125	1	0	0	0		NB127	1	0	0	0
NB134	0	0	0	0		NB128	0	0	0	0		NB129	0	0	0	0		NB131	0	0	0	0
NB138	0	1	0	0		NB132	0	0	0	0		NB133	1	0	1	0		NB135	0	0	0	0
NB142	1	0	0	0		NB136	0	1	1	1		NB137	0	1	1	1		NB139	1	0	0	0
NB146	0	0	0	0		NB140	1	1	1	1		NB141	0	0	0	0		NB143	1	1	0	0
NB150	1	0	0	0		NB144	0	1	0	0		NB145	0	0	0	0		NB147	0	0	0	0
NB154	0	0	0	0		NB148	0	0	0	0		NB149	1	0	1	1		NB151	1	0	0	0
NB158	1	0	0	0		NB152	0	0	0	0		NB153	1	0	0	0		NB155	0	0	0	0
NB162	1	0	0	0		NB156	0	0	0	0		NB157	0	0	0	0		NB159	1	0	0	0
NB166	0	0	0	0		NB160	0	0	0	0		NB161	1	0	0	0		NB163	0	0	0	0
NB170	0	0	1	0		NB164	0	0	0	0		NB165	1	0	0	0		NB167	0	0	0	0
NB174	0	0	0	0		NB168	1	0	0	0		NB169	0	1	1	1		NB171	0	0	0	0
NB178	0	0	0	0		NB172	0	0	0	0		NB173	1	0	1	0		NB175	1	1	0	0
NB182	0	0	0	0		NB176	0	0	0	0		NB177	1	0	1	0		NB179	0	0	1	0
NB190	0	0	1	1		NB180	1	0	0	0		NB181	0	0	1	0		NB183	0	0	0	0
NB194	1	1	1	1		NB184	0	0	0	0		NB185	1	0	0	0		NB187	0	0	0	0
NB198	1	1	1	1		NB186	1	0	1	0		NB189	0	0	1	0		NB191	1	0	1	0
NB202	0	0	0	0		NB188	1	0	1	1		NB193	1	0	0	0		NB195	1	1	1	1
NB206	0	0	0	0		NB192	0	0	1	1		NB197	1	1	1	1		NB199	0	0	0	0
NB210	0	0	0	0		NB196	0	1	0	0		NB201	0	0	0	0		NB203	0	0	0	0
NB214	1	0	0	0		NB200	0	0	0	0		NB205	0	0	0	0		NB207	1	0	0	0
NB218	0	0	0	0		NB204	1	0	0	0		NB209	1	0	0	0		NB211	0	0	0	0
NB226	0	0	0	0		NB208	1	0	0	0		NB213	0	0	0	0		NB215	0	0	0	0
NB230	0	0	0	0		NB212	0	0	1	0		NB217	0	0	0	0		NB219	0	0	0	0
NB234	1	0	1	0		NB216	0	0	0	0		NB221	0	0	0	0		NB223	1	0	1	0
NB238	0	0	0	0		NB220	1	0	0	0		NB225	0	0	0	0		NB227	0	0	1	0
NB242	1	1	1	1		NB222	1	0	1	0		NB229	1	0	0	0		NB231	0	0	1	0
NB246	0	1	1	0		NB224	1	0	1	0		NB233	0	0	1	0		NB235	1	0	1	0
NB250	1	1	1	1		NB228	1	0	0	0		NB237	1	0	0	0		NB239	0	1	0	0
NB254	0	1	0	0		NB232	1	0	1	0		NB241	0	1	0	0		NB243	0	1	0	0
NB258	1	1	0	0		NB236	0	1	0	0		NB245	0	1	1	1		NB247	0	1	1	0
NB262	1	1	1	1		NB240	1	0	1	0		NB249	0	1	0	0		NB251	0	1	0	0
NB266	1	1	0	0		NB244	0	1	1	1		NB253	1	0	0	0		NB255	1	1	1	1
NB270	0	1	1	1		NB248	0	1	0	0		NB257	1	1	1	1		NB259	1	1	1	1
NB274	1	0	0	0		NB252	1	1	1	1		NB261	0	1	0	0		NB263	1	1	1	1
NB278	0	0	0	0		NB256	1	1	1	1		NB265	0	1	0	0		NB267	1	1	1	1
NB282	0	0	1	0		NB260	1	1	0	0		NB269	1	1	1	1		NB271	0	1	1	1
NB286	0	0	0	0		NB264	1	1	1	1		NB273	0	0	1	0		NB275	1	0	0	0
NB290	0	0	0	0		NB268	0	1	1	1		NB277	1	0	0	0		NB279	0	0	0	0
NB294	1	0	0	0		NB272	0	1	1	0		NB281	0	0	0	0		NB283	0	0	0	0
NB298	1	0	0	0		NB276	0	0	0	0		NB285	0	0	0	0		NB287	1	0	1	1
NB302	1	0	1	0		NB280	1	0	0	0		NB289	1	0	1	1		NB291	1	0	0	0
NB306	1	0	0	0		NB284	0	0	1	0		NB293	0	0	0	0		NB295	1	0	1	0
NB310	0	0	0	0		NB288	1	0	0	0		NB297	0	0	1	0		NB299	0	0	0	0
NB314	0	1	1	1		NB292	0	0	0	0		NB301	0	0	0	0		NB303	0	0	0	0
NB318	1	0	0	0		NB296	0	0	0	0		NB305	1	0	1	1		NB307	1	0	0	0
NB322	0	1	1	1		NB300	0	0	1	0		NB309	0	0	1	0		NB311	1	0	1	0
NB326	1	1	1	1		NB304	0	0	0	0		NB313	0	1	0	0		NB315	0	0	0	0
NB330	0	0	0	0		NB308	1	0	0	0		NB317	1	0	0	0		NB319	0	1	1	1
NB334	1	0	0	0		NB312	0	0	0	0		NB321	0	1	1	1		NB323	0	0	1	1
NB338	1	1	0	0		NB316	0	1	1	1		NB325	0	0	0	0		NB327	0	1	1	1
NB342	1	0	0	0		NB320	0	1	1	1		NB329	0	0	0	0		NB331	0	1	1	1
NB346	1	0	0	0		NB324	0	0	0	0		NB333	0	1	1	1		NB335	1	1	1	1
NB350	1	0	0	0		NB328	1	1	1	1		NB337	0	1	1	1		NB339	1	1	1	1
NB354	1	0	1	1		NB332	0	1	0	0		NB341	0	1	1	0		NB343	1	0	0	0
NB358	1	0	1	0		NB336	0	1	1	0		NB345	0	0	0	0		NB347	1	0	0	0
NB362	0	1	1	1		NB340	1	0	0	0		NB349	1	0	0	0		NB351	0	1	0	0
NB366	0	0	0	0		NB344	0	0	0	0		NB353	0	0	1	1		NB355	0	0	0	0
NB370	0	0	0	0		NB348	0	0	0	0		NB357	1	0	1	0		NB359	0	1	1	1
NB374	0	1	1	0		NB352	0	1	0	0		NB361	0	0	1	0		NB363	0	0	0	0
NB378	1	1	1	1		NB356	0	0	0	0		NB365	0	0	0	0		NB367	1	0	0	0
NB382	1	0	0	0		NB360	0	1	1	1		NB369	0	1	1	1		NB371	1	1	1	1
NB386	1	1	1	1		NB364	0	0	0	0		NB373	1	1	1	1		NB375	0	1	1	1
NB390	1	1	1	1		NB368	1	0	0	0		NB377	0	1	1	1		NB379	0	1	0	0
NB394	0	1	1	0		NB372	0	1	1	0		NB381	1	1	1	1		NB383	0	1	1	1
NB398	0	0	1	0		NB376	0	1	1	1		NB385	1	1	1	1		NB387	0	0	0	0
NB402	1	1	1	0		NB380	1	0	0	0		NB389	0	1	0	0		NB391	0	1	0	0
NB406	1	1	1	1		NB384	1	1	1	1		NB393	0	1	1	1		NB395	1	0	0	0
NB410	1	1	0	0		NB388	0	1	1	1		NB397	0	0	0	0		NB399	0	1	0	0
NB414	0	1	1	1		NB392	0	1	1	1		NB401	0	1	1	0		NB403	0	1	1	1
NB418	0	1	0	0		NB396	1	1	1	1		NB405	0	1	0	0		NB407	0	1	1	1
NB422	0	1	1	0		NB400	0	1	1	0		NB409	0	1	0	0		NB411	1	1	1	0
NB426	0	1	0	0		NB404	1	1	1	1		NB413	1	1	0	0		NB419	1	0	0	0
NB428	0	1	0	0		NB408	0	1	1	1		NB415	1	1	1	0		NB423	0	0	1	0
NB430	0	1	1	0		NB412	0	1	1	0		NB417	0	0	0	0		NB427	0	0	0	0
NB434	0	0	0	0		NB416	0	0	1	0		NB421	0	0	0	0		NB431	1	1	0	0
NB436	0	1	0	0		NB420	1	0	0	0		NB425	0	0	0	0		NB435	1	0	0	0
NB438	0	1	1	1		NB424	1	1	0	0		NB429	1	0	0	0		NB439	0	1	1	1
NB442	1	1	1	1		NB432	1	1	0	0		NB433	1	0	0	0		NB441	0	0	0	0
NB446	0	1	1	1		NB440	0	1	1	1		NB437	1	1	1	1		NB443	1	1	1	1
NB450	0	0	0	0		NB444	0	1	1	1		NB445	0	1	1	1		NB447	0	1	1	1
NB454	0	1	1	1		NB448	1	1	1	0		NB449	1	1	0	0		NB451	0	0	0	0
NB458	1	1	1	1		NB452	1	0	0	0		NB453	0	0	0	0		NB455	0	0	0	0
NB462	1	0	0	0		NB456	0	1	1	1		NB457	0	1	1	1		NB459	0	1	0	0
NB466	1	1	1	0		NB460	1	1	1	0		NB461	0	1	0	0		NB463	1	0	1	0
NB470	0	0	0	0		NB464	0	1	1	1		NB465	1	1	0	0		NB467	0	1	0	0
NB474	1	0	1	0		NB468	0	0	1	0		NB469	0	1	1	0		NB471	1	0	0	0
NB478	0	1	0	0		NB472	1	0	0	0		NB473	1	0	0	0		NB475	0	1	1	1
NB480	0	1	0	0		NB476	1	0	0	0		NB477	0	0	0	0		NB479	1	0	0	0
NB482	0	0	0	0		NB484	1	1	0	0		NB481	0	1	0	0		NB483	1	0	1	0
NB486	0	1	1	0		NB488	1	0	0	0		NB485	1	1	0	0		NB487	0	1	0	0
NB490	1	1	1	0		NB492	0	1	1	1		NB489	1	1	0	0		NB491	0	1	1	0
NB494	0	0	0	0		NB496	0	0	1	0		NB493	0	0	0	0		NB495	0	0	0	0
NB498	1	0	0	0								NB497	1	0	0	0
	Gender	High-risk	progression	death from disease			Gender	High-risk	progression	death from disease			Gender	High-risk	progression	death from disease			Gender	High-risk	progression	death from disease
	0.448	0.368	0.376	0.208			0.419355	0.354839	0.379032	0.225806			0.408	0.344	0.352	0.208			0.419355	0.346774	0.362903	0.201613

## Sheet: Maris
Valid
Patient_id	progression	death from disease
W001	0	0
W002	0	0
W003	0	0
W004	0	0
W005	0	0
W006	0	0
W007	0	0
W008	0	0
W009	0	0
W010	0	0
W011	0	0
W012	0	0
W013	0	0
W014	0	0
W015	0	0
W016	0	0
W017	0	0
W018	0	0
W019	0	0
W020	0	0
W021	0	0
W022	0	0
W023	0	0
W024	0	0
W025	0	0
W026	0	0
W027	0	0
W028	0	0
W029	0	0
W030	0	0
W031	0	0
W032	0	0
W033	0	0
W034	0	0
W035	0	0
W036	0	0
W037	0	0
W038	0	0
W039	0	0
W040	0	0
W041	0	0
W042	0	0
W043	0	0
W044	0	0
W045	0	0
W046	0	0
W047	0	0
W048	0	0
W049	0	0
W050	0	0
W051	0	0
W052	0	0
W053	0	0
W054	0	0
W055	0	0
W056	0	0
W057	0	0
W058	0	0
W059	0	0
W060	0	0
W061	0	0
W062	1	1
W063	1	1
W064	1	1
W065	1	1
W066	1	1
W067	1	1
W068	1	1
W069	1	1
W070	1	1
W071	1	1
W072	1	1
W073	1	1
W074	1	0
W075	1	1
W076	1	1
W077	1	1
W078	1	0
W079	1	0
W080	1	0
W081	1	1
W082	1	1
W083	1	1
W084	1	1
W085	1	1
W086	1	1
W087	1	1
W088	1	1
W089	1	1
W090	1	1
W091	1	0
W092	1	1
	progression	death from disease
	0.336957	0.282609

## Sheet: Versteeg
Valid
Patient_id	progression	death from disease
X001	0	0
X002	0	0
X003	0	0
X004	0	0
X005	0	0
X006	0	0
X007	0	0
X008	0	0
X009	0	0
X010	0	0
X011	0	0
X012	0	0
X013	0	0
X014	0	0
X015	0	0
X016	0	0
X017	0	0
X018	0	0
X019	0	0
X020	0	0
X021	0	0
X022	0	0
X023	0	0
X024	0	0
X025	0	0
X026	0	0
X027	0	0
X028	0	0
X029	0	0
X030	0	0
X031	0	0
X032	0	0
X033	0	0
X034	0	0
X035	0	0
X036	0	0
X037	0	0
X038	0	0
X039	0	0
X040	0	0
X041	0	0
X042	0	0
X043	0	0
X044	0	0
X045	0	0
X046	0	0
X047	0	0
X048	0	0
X049	0	0
X050	0	0
X051	0	0
X052	0	0
X053	0	0
X054	1	1
X055	1	1
X056	1	1
X057	1	1
X058	1	0
X059	1	1
X060	1	0
X061	1	1
X062	1	1
X063	1	1
X064	1	1
X065	1	1
X066	1	1
X067	1	0
X068	1	1
X069	1	1
X070	1	1
X071	1	1
X072	1	1
X073	1	0
X074	1	0
X075	1	1
X076	1	1
X077	1	1
X078	1	1
X079	1	1
X080	1	1
X081	1	1
X082	1	1
X083	1	1
X084	1	1
X085	1	1
X086	1	1
X087	1	1
X088	1	1
	progression	death from disease
	0.397727	0.340909
